# Supplementary material for: Determination of the kinetics of crystallisation of gibbsite using time resolved in situ energy dispersive powder X-ray diffraction
Source: Royal Society of Chemistry journal article supplement (doi:10.1039/b005198p), 2000-01-01
Supplement: b005198p.doc [file b005198p.doc]

# **Supplementary Data**

**Determination of the Kinetics of Crystallisation of Gibbsite using Time Resolved *in situ* Energy Dispersive Powder X-ray Diffraction**

**Andrew M. Fogg, Stephen J. Price, Robin J. Francis, Stephen O’Brien, Dermot O’Hare***

*Inorganic Chemistry Laboratory, University of Oxford, South Parks Road, Oxford, OX1 3QR, U.K.*

Email: [dermot.ohare@chem.ox.ac.uk](mailto:dermot.ohare@chem.ox.ac.uk)

Raw  versus time data for the crystallisation of gibbsite from a supersaturated sodium aluminate solution (3.77M NaOH) at 65˚C, day shown in Fig 4.

| Time (s) | Extent of Reaction ( |
| --- | --- |
| 120.00 | -0.00055556 |
| 240.00 | -0.00055556 |
| 360.00 | -0.00055556 |
| 480.00 | 0.0000 |
| 600.00 | 0.0072222 |
| 720.00 | -0.035556 |
| 840.00 | 0.0016667 |
| 960.00 | 0.0011111 |
| 1080.0 | 0.00055556 |
| 1200.0 | 0.0083333 |
| 1320.0 | 0.0016667 |
| 1440.0 | -0.00055556 |
| 1560.0 | 0.0000 |
| 1680.0 | 0.00055556 |
| 1800.0 | 0.0027778 |
| 1920.0 | -0.086111 |
| 2040.0 | 0.0011111 |
| 2160.0 | 0.0033333 |
| 2280.0 | 0.00055556 |
| 2400.0 | 0.0027778 |
| 2520.0 | 0.0016667 |
| 2640.0 | 0.0000 |
| 2760.0 | 0.0022222 |
| 2880.0 | 0.055556 |
| 3000.0 | 0.0016667 |
| 3120.0 | -0.00055556 |
| 3240.0 | -0.0011111 |
| 3360.0 | 0.0033333 |
| 3480.0 | 0.0061111 |
| 3600.0 | -0.0016667 |
| 3720.0 | 0.012222 |
| 3840.0 | 0.029444 |
| 3960.0 | 0.0033333 |
| 4080.0 | 0.00055556 |
| 4200.0 | -0.022778 |
| 4320.0 | 0.0055556 |
| 4440.0 | 0.0088889 |
| 4560.0 | -0.0055556 |
| 0.0000 |  |
| 4800.0 | 0.0066667 |
| 4920.0 | 0.0000 |
| 5040.0 | -0.0016667 |
| 5160.0 | 0.0055556 |
| 5280.0 | 0.0100000 |
| 5400.0 | 0.0061111 |
| 5520.0 | -0.00055556 |
| 5640.0 | 0.00055556 |
| 5760.0 | 0.0022222 |
| 5880.0 | -0.0027778 |
| 6000.0 | 0.0055556 |
| 6120.0 | 0.0022222 |
| 6240.0 | 0.0016667 |
| 6360.0 | 0.0000 |
| 6480.0 | 0.0033333 |
| 6600.0 | 0.0022222 |
| 6720.0 | 0.0061111 |
| 6840.0 | 0.0000 |
| 6960.0 | 0.023333 |
| 7080.0 | 0.0033333 |
| 7200.0 | -0.0061111 |
| 7320.0 | 0.0077778 |
| 7440.0 | 0.0044444 |
| 7560.0 | 0.018889 |
| 7680.0 | 0.0094444 |
| 7800.0 | 0.022778 |
| 7920.0 | 0.027222 |
| 8040.0 | 0.035000 |
| 8160.0 | 0.068889 |
| 8280.0 | 0.058333 |
| 8400.0 | 0.070000 |
| 8520.0 | 0.067778 |
| 8640.0 | 0.068889 |
| 8760.0 | 0.091667 |
| 8880.0 | 0.10889 |
| 9000.0 | 0.10333 |
| 9120.0 | 0.11333 |
| 9240.0 | 0.12500 |
| 9360.0 | 0.14556 |
| 9480.0 | 0.15944 |
| 9600.0 | 0.15278 |
| 9720.0 | 0.17889 |
| 9840.0 | 0.18833 |
| 9960.0 | 0.19833 |
| 10080 | 0.19556 |
| 10200 | 0.22389 |
| 10320 | 0.22389 |
| 10440 | 0.21056 |
| 10560 | 0.23778 |
| 10680 | 0.23500 |
| 10800 | 0.24833 |
| 10920 | 0.25278 |
| 11040 | 0.28444 |
| 11160 | 0.27889 |
| 11280 | 0.31778 |
| 11400 | 0.29389 |
| 11520 | 0.32056 |
| 11640 | 0.34278 |
| 11760 | 0.34278 |
| 11880 | 0.34500 |
| 12000 | 0.33667 |
| 12120 | 0.34278 |
| 12240 | 0.35833 |
| 12360 | 0.38389 |
| 12480 | 0.39556 |
| 12600 | 0.40556 |
| 12720 | 0.39611 |
| 12840 | 0.41056 |
| 12960 | 0.42389 |
| 13080 | 0.40278 |
| 13200 | 0.42167 |
| 13320 | 0.44444 |
| 13440 | 0.43389 |
| 13560 | 0.43944 |
| 13680 | 0.46556 |
| 13800 | 0.46167 |
| 13920 | 0.48056 |
| 14040 | 0.45167 |
| 14160 | 0.48889 |
| 14280 | 0.50333 |
| 14400 | 0.47778 |
| 14520 | 0.50500 |
| 14640 | 0.51500 |
| 14760 | 0.51889 |
| 14880 | 0.50167 |
| 15000 | 0.50278 |
| 15120 | 0.54111 |
| 15240 | 0.50389 |
| 15360 | 0.49333 |
| 15480 | 0.57833 |
| 15600 | 0.57722 |
| 15720 | 0.56889 |
| 15840 | 0.54056 |
| 15960 | 0.58611 |
| 16080 | 0.55278 |
| 16200 | 0.59556 |
| 16320 | 0.55444 |
| 16440 | 0.61056 |
| 16560 | 0.60611 |
| 16680 | 0.61889 |
| 16800 | 0.57000 |
| 16920 | 0.62889 |
| 17040 | 0.63056 |
| 17160 | 0.58778 |
| 17280 | 0.62333 |
| 17400 | 0.64667 |
| 17520 | 0.63556 |
| 17640 | 0.61056 |
| 17760 | 0.63944 |
| 17880 | 0.65833 |
| 18000 | 0.61944 |
| 18120 | 0.67833 |
| 18240 | 0.64778 |
| 18360 | 0.63611 |
| 18480 | 0.66722 |
| 18600 | 0.64111 |
| 18720 | 0.64722 |
| 18840 | 0.61278 |
| 18960 | 0.66500 |
| 19080 | 0.65333 |
| 19200 | 0.65556 |
| 19320 | 0.72500 |
| 19440 | 0.68056 |
| 19560 | 0.68444 |
| 19680 | 0.67111 |
| 19800 | 0.72278 |
| 19920 | 0.66944 |
| 20040 | 0.65833 |
| 20160 | 0.71222 |
| 20280 | 0.69833 |
| 20400 | 0.71000 |
| 20520 | 0.70222 |
| 20640 | 0.69722 |
| 20760 | 0.70611 |
| 20880 | 0.75444 |
| 21000 | 0.76333 |
| 21120 | 0.76556 |
| 21240 | 0.69333 |
| 21360 | 0.74111 |
| 21480 | 0.77333 |
| 21600 | 0.74278 |
| 21720 | 0.73111 |
| 21840 | 0.78500 |
| 21960 | 0.78611 |
| 22080 | 0.74444 |
| 22200 | 0.74111 |
| 22320 | 0.78111 |
| 22440 | 0.74000 |
| 22560 | 0.74111 |
| 22680 | 0.80556 |
| 22800 | 0.78944 |
| 22920 | 0.79889 |
| 23040 | 0.75500 |
| 23160 | 0.74444 |
| 23280 | 0.79222 |
| 23400 | 0.79056 |
| 23520 | 0.79167 |
| 23640 | 0.80611 |
| 23760 | 0.81667 |
| 23880 | 0.80611 |
| 24000 | 0.77444 |
| 24120 | 0.78111 |
| 24240 | 0.82056 |
| 24360 | 0.82667 |
| 24480 | 0.77444 |
| 24600 | 0.77722 |
| 24720 | 0.79611 |
| 24840 | 0.82056 |
| 24960 | 0.84333 |
| 25080 | 0.78778 |
| 25200 | 0.78278 |
| 25320 | 0.85333 |
| 25440 | 0.83278 |
| 25560 | 0.79889 |
| 25680 | 0.81000 |
| 25800 | 0.81333 |
| 25920 | 0.81556 |
| 26040 | 0.80944 |
| 26160 | 0.84111 |
| 26280 | 0.86167 |
| 26400 | 0.82278 |
| 26520 | 0.85833 |
| 26640 | 0.87333 |
| 26760 | 0.87222 |
| 26880 | 0.86278 |
| 27000 | 0.80833 |
| 27120 | 0.82611 |
| 27240 | 0.87389 |
| 27360 | 0.86833 |
| 27480 | 0.84222 |
| 27600 | 0.87944 |
| 27720 | 0.89389 |
| 27840 | 0.82778 |
| 27960 | 0.88111 |
| 28080 | 0.82333 |
| 28200 | 0.83000 |
| 28320 | 0.87500 |
| 28440 | 0.88167 |
| 28560 | 0.82167 |
| 28680 | 0.87889 |
| 28800 | 0.86333 |
| 28920 | 0.82944 |
| 29040 | 0.83889 |
| 29160 | 0.82278 |
| 29280 | 0.83778 |
| 29400 | 0.85611 |
| 29520 | 0.88500 |
| 29640 | 0.82222 |
| 29760 | 0.83333 |
| 29880 | 0.85778 |
| 30000 | 0.89667 |
| 30120 | 0.90611 |
| 30240 | 0.89500 |
| 30360 | 0.85611 |
| 30480 | 0.86333 |
| 30600 | 0.85167 |
| 30720 | 0.83333 |
| 30840 | 0.85278 |
| 30960 | 0.88556 |
| 31080 | 0.87278 |
| 31200 | 0.91389 |
| 31320 | 0.90444 |
| 31440 | 0.91389 |
| 31560 | 0.86167 |
| 31680 | 0.89278 |
| 31800 | 0.86944 |
| 31920 | 0.86222 |
| 32040 | 0.91333 |
| 32160 | 0.85389 |
| 32280 | 0.90111 |
| 32400 | 0.92611 |
| 32520 | 0.88333 |
| 32640 | 0.91111 |
| 32760 | 0.92167 |
| 32880 | 0.91500 |
| 33000 | 0.88111 |
| 33120 | 0.87278 |
| 33240 | 0.91500 |
| 33360 | 0.87222 |
| 33480 | 0.92111 |
| 33600 | 0.90056 |
| 33720 | 0.87500 |
| 33840 | 0.85333 |
| 33960 | 0.92556 |
| 34080 | 0.86889 |
| 34200 | 0.90167 |
| 34320 | 0.92667 |
| 34440 | 0.90667 |
| 34560 | 0.92111 |
| 34680 | 0.87722 |
| 34800 | 0.86889 |
| 34920 | 0.91889 |
| 35040 | 0.93389 |
| 35160 | 0.89667 |
| 35280 | 0.90722 |
| 35400 | 0.88944 |
| 35520 | 0.88556 |
| 35640 | 0.87667 |
| 35760 | 0.87056 |
| 35880 | 0.88000 |
| 36000 | 0.87889 |
| 36120 | 0.87389 |
| 36240 | 0.92667 |
| 36360 | 0.87333 |
| 36480 | 0.87889 |
| 36600 | 0.93222 |
| 36720 | 0.93056 |
| 36840 | 0.93944 |
| 36960 | 0.88611 |
| 37080 | 0.93778 |
| 37200 | 0.91111 |
| 37320 | 0.92611 |
| 37440 | 0.90556 |
| 37560 | 0.90611 |
| 37680 | 0.94111 |
| 37800 | 0.94722 |
| 37920 | 0.94833 |
| 38040 | 0.88611 |
| 38160 | 0.88778 |
| 38280 | 0.90444 |
| 38400 | 0.88444 |
| 38520 | 0.90389 |
| 38640 | 0.90556 |
| 38760 | 0.89500 |
| 38880 | 0.91944 |
| 39000 | 0.94444 |
| 39120 | 0.90056 |
| 39240 | 0.94833 |
| 39360 | 0.90944 |
| 39480 | 0.94056 |
| 39600 | 0.94944 |
| 39720 | 0.94500 |
| 39840 | 0.91389 |
| 39960 | 0.94056 |
| 40080 | 0.96111 |
| 40200 | 0.90111 |
| 40320 | 0.91000 |
| 40440 | 0.95111 |
| 40560 | 0.94611 |
| 40680 | 0.95722 |
| 40800 | 0.94611 |
| 40920 | 0.96722 |
| 41040 | 0.96389 |
| 41160 | 0.96944 |
| 41280 | 0.92611 |
| 41400 | 0.92444 |
| 41520 | 0.96556 |
| 41640 | 0.95833 |
| 41760 | 0.95556 |
| 41880 | 0.91778 |
| 42000 | 0.96278 |
| 42120 | 0.96111 |
| 42240 | 0.91833 |
| 42360 | 0.96778 |
| 42480 | 0.91389 |
| 42600 | 0.96444 |
| 42720 | 0.92444 |
| 42840 | 0.93222 |
| 42960 | 0.96611 |
| 43080 | 0.97611 |
| 43200 | 0.95722 |
| 43320 | 0.97556 |
| 43440 | 0.98222 |
| 43560 | 0.96944 |
| 43680 | 0.97944 |
| 43800 | 0.96667 |
| 43920 | 0.97444 |
| 44040 | 0.97889 |
| 44160 | 0.97833 |
| 44280 | 0.97944 |
| 44400 | 0.98889 |
| 44520 | 0.95278 |
| 44640 | 0.91944 |
| 44760 | 0.96611 |
| 44880 | 0.96944 |
| 45000 | 0.93333 |
| 45120 | 0.92611 |
| 45240 | 0.97722 |
| 45360 | 0.94000 |
| 45480 | 0.92056 |
| 45600 | 0.98167 |
| 45720 | 0.93278 |
| 45840 | 0.99611 |
| 45960 | 0.93944 |
| 46080 | 0.99667 |
| 46200 | 0.95278 |
| 46320 | 0.93778 |
| 46440 | 0.95778 |
| 46560 | 0.98278 |
| 46680 | 0.95389 |
| 46800 | 0.94556 |
| 46920 | 0.93944 |
| 47040 | 0.94278 |
| 47160 | 0.93556 |
| 47280 | 0.97667 |
| 47400 | 0.97444 |
| 47520 | 0.94333 |
| 47640 | 0.97889 |
| 47760 | 0.93222 |
| 47880 | 0.92778 |
| 48000 | 0.97556 |
